# Supplementary material
Source: HighWire-hosted journal article supplement (doi:10.1101/rna.072587.119)

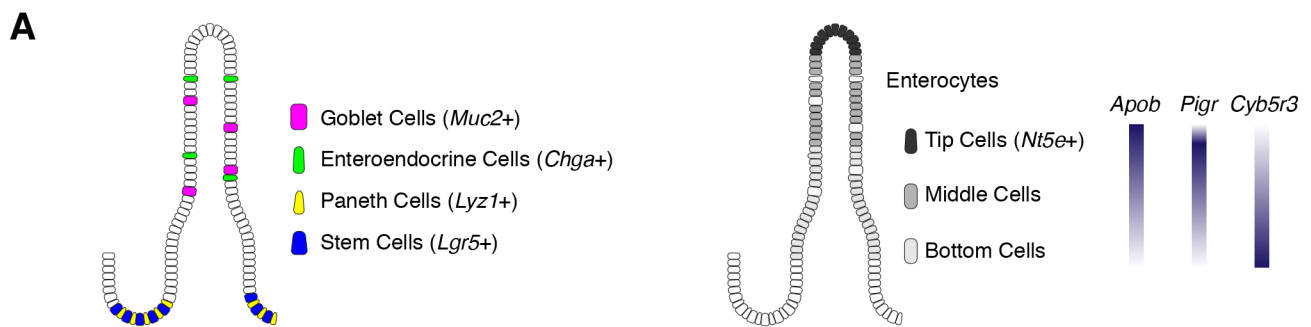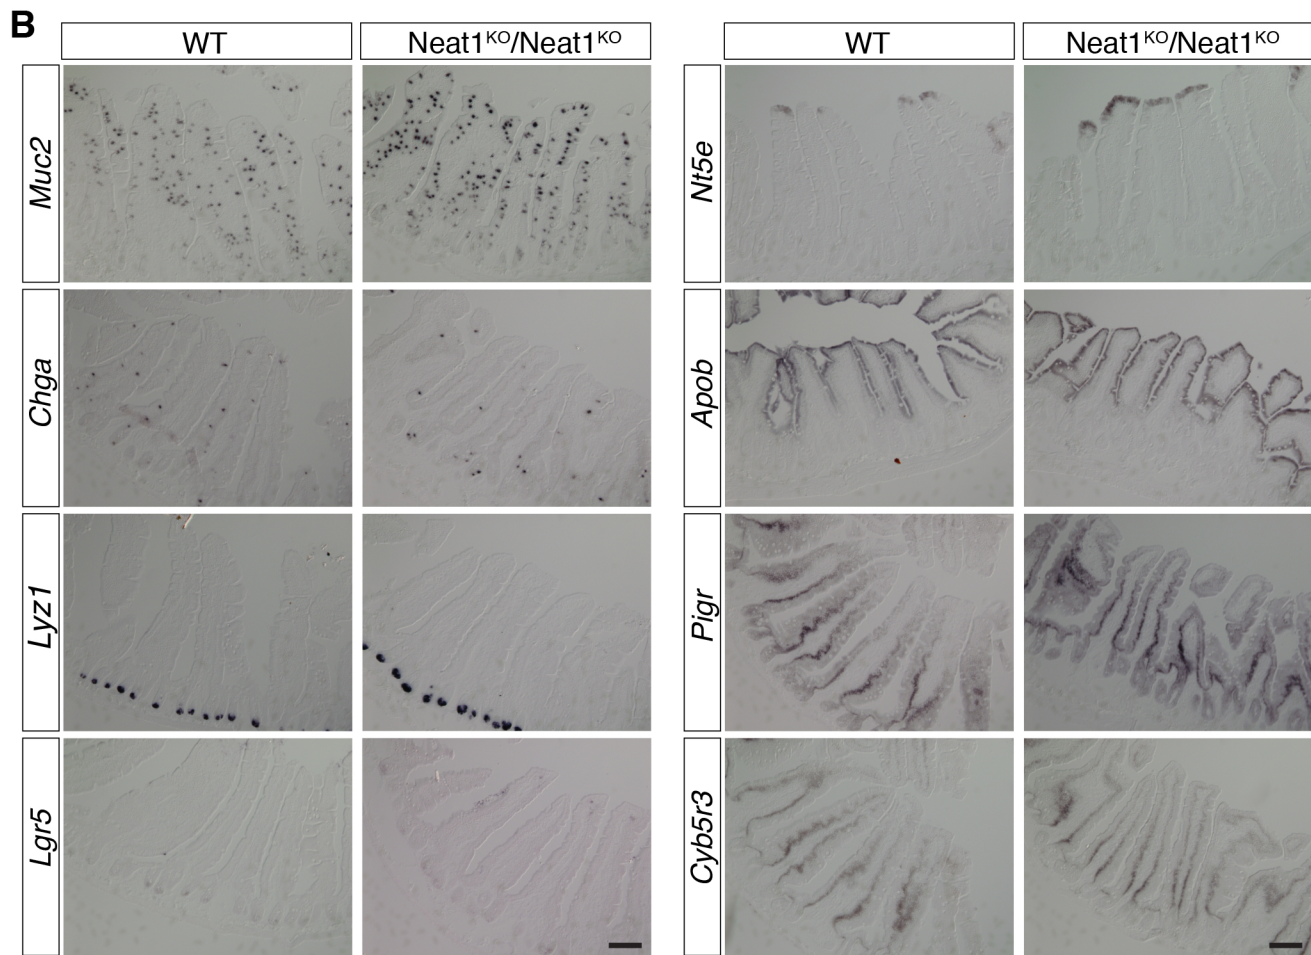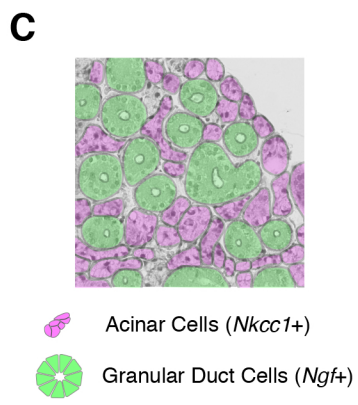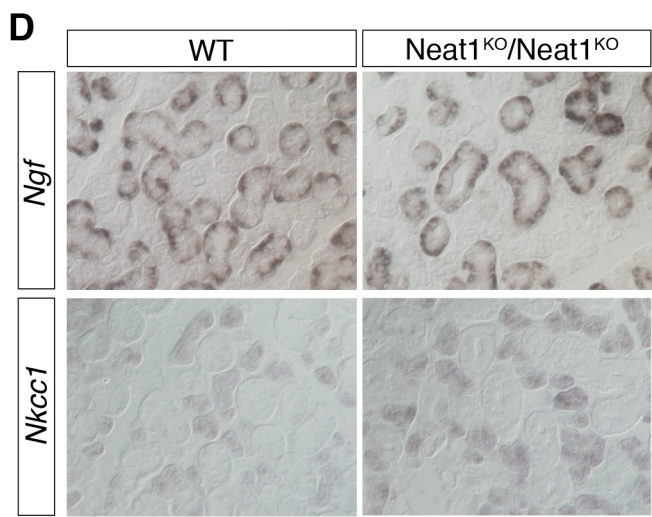

Supplement: Supplemental_Fig_S4.pdf [file Supplemental_Fig_S4.pdf]
